# Supplementary material for: Photo-isomerisation of alkenyl complexes of platinum(ii): structural, spectroscopic, kinetic and computational investigations
Source: Royal Society of Chemistry journal article supplement (doi:10.1039/c3dt32354d), 2013-01-01
Supplement: c3dt32354d.pdf [file c3dt32354d.pdf]

## Supplementary Information

### **Photo-isomerisation of alkenyl complexes of platinum(II): structural, spectroscopic, kinetic, and computational investigations**

Carmen R. Barone,<sup>a</sup> Cecilia Coletti,<sup>c</sup> Ruth J. McQuitty,<sup>b</sup> Nicola J. Farrer,<sup>b</sup> Giuseppe Lorusso,<sup>a</sup> Luciana Maresca,<sup>\*a</sup> Alessandro Marrone,<sup>c</sup> Giovanni Natile,<sup>a</sup> Concetta Pacifico,<sup>a</sup> Simon Parsons,<sup>d</sup> Nazzareno Re,<sup>c</sup> Peter J. Sadler,<sup>b</sup> and Fraser J. White.<sup>d</sup>

<sup>a</sup> *Dipartimento di Chimica, Università degli Studi “Aldo Moro” di Bari, Via E. Orabona 4, I-70125 Bari, Italy . E-mail: [luciana.maresca@uniba.it](mailto:luciana.maresca@uniba.it)*

<sup>b</sup> *Department of Chemistry, University of Warwick, Coventry CV4 7AL, U. K.*

<sup>c</sup> *Dipartimento di Farmacia, Università degli Studi “Gabriele d’Annunzio”, Via dei Vestini 31, I-06100 Chieti, Italy.*

<sup>d</sup> *School of Chemistry, The University of Edinburgh, King’s Building, West Mains Road, Scotland, EH9 3JJ, U. K.*

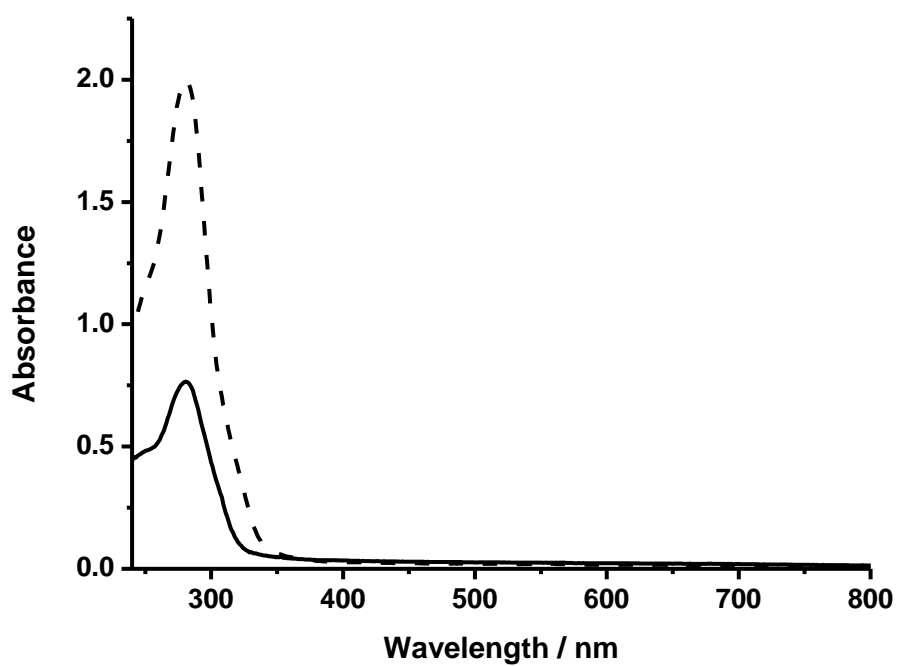

**Figure S1.** UV-Vis absorption spectrum of 87  $\mu\text{M}$  compound (*E*)-**2a** (solid line) and of 79  $\mu\text{M}$  (*E*)-**2b** (dotted line) in  $\text{CDCl}_3$ .

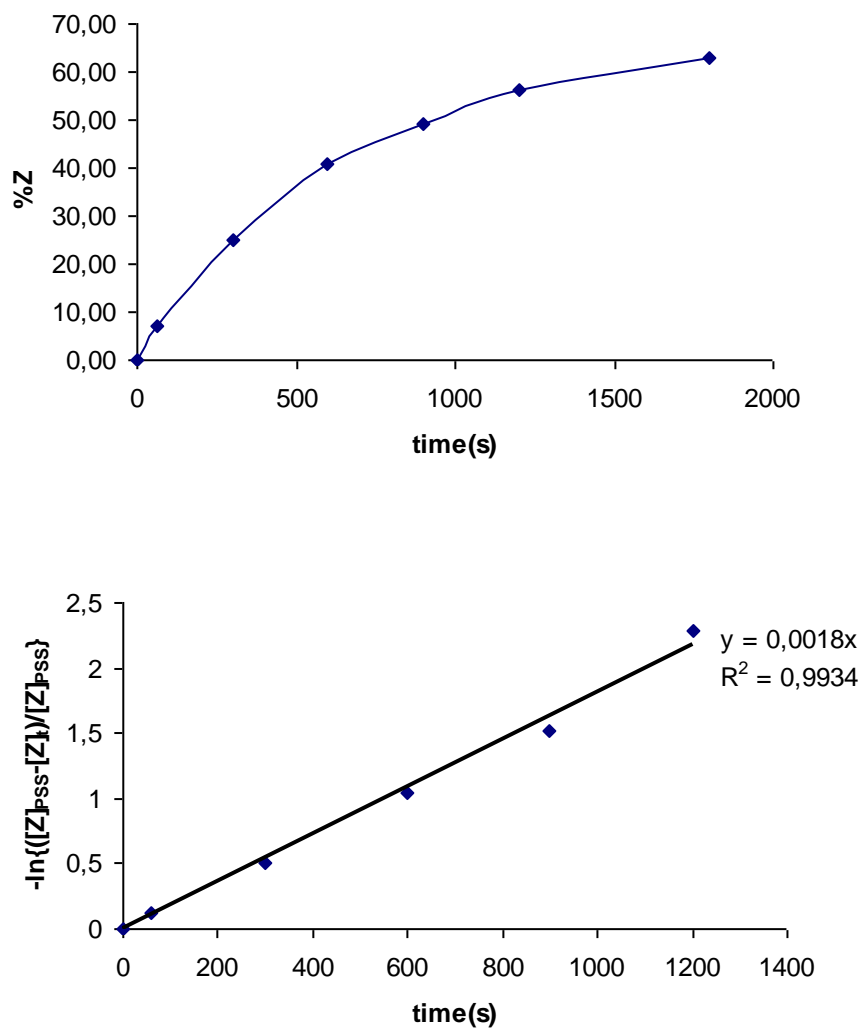

**Figure S2.** Photo-isomerisation of (*E*)-**2a** ( $\lambda = 351$  nm). Top: plot of percentage of Z isomer (%Z) versus time of irradiation (s). Bottom: plot of  $-\ln\{([Z]_{PSS}-[Z]_t)/[Z]_{PSS}\}$  against time (s).

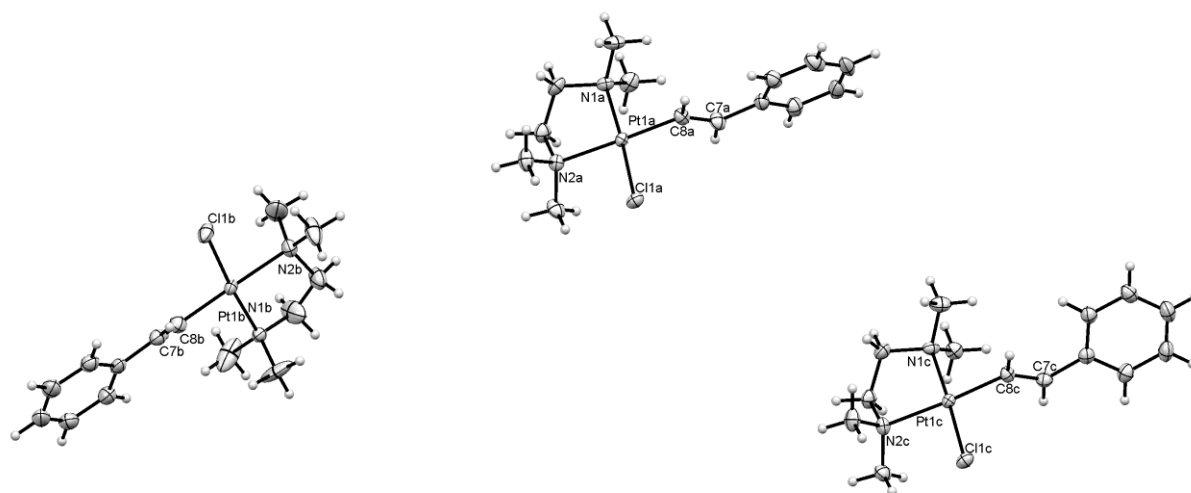

**Figure S3.** The three independent molecules in the asymmetric unit of compound (*E*)-**2a**. The ellipsoids enclose 50% probability.

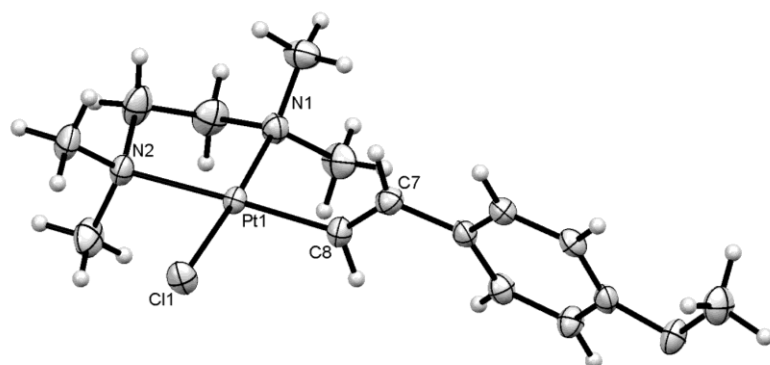

**Figure S4.** The single molecule in the asymmetric unit of compound (*E*)-**2b**. The ellipsoids enclose 30% probability.

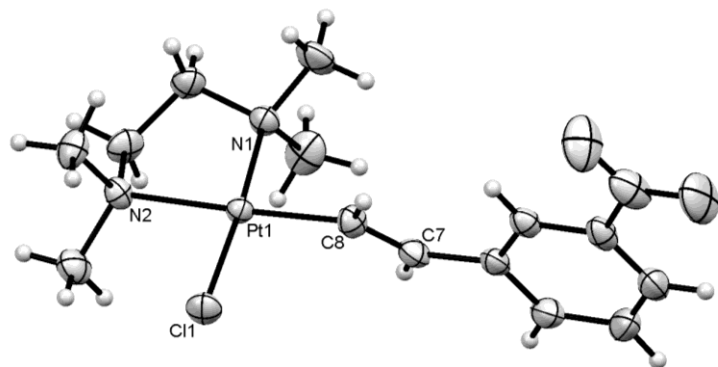

**Figure S5.** The single molecule in the asymmetric unit of compound (*E*)-**2c**. The ellipsoids enclose 30% probability.

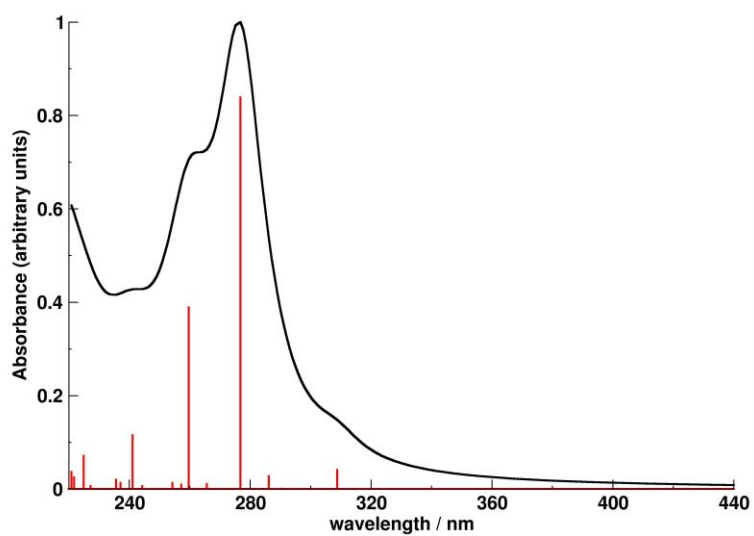

**Figure S6.** Experimental and calculated UV-Vis spectrum for (*E*)-**2a**.

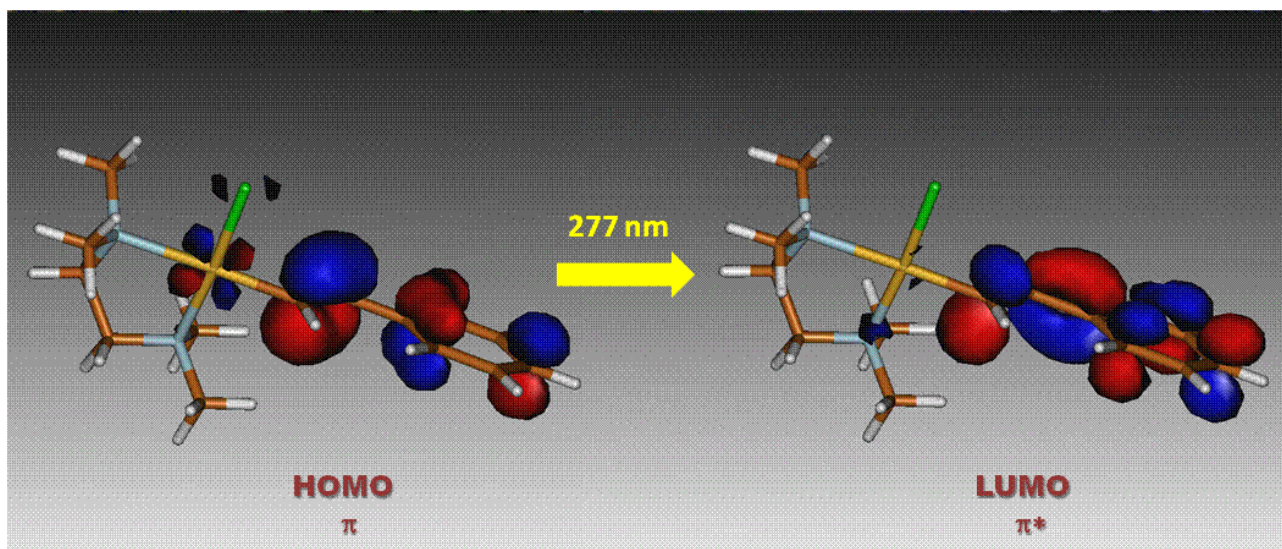

**Figure S7.** HOMO and LUMO orbitals involved in the  $\pi \rightarrow \pi^*$  transition at 277 nm ( $S_3$ ) for (*E*)-**2a**.



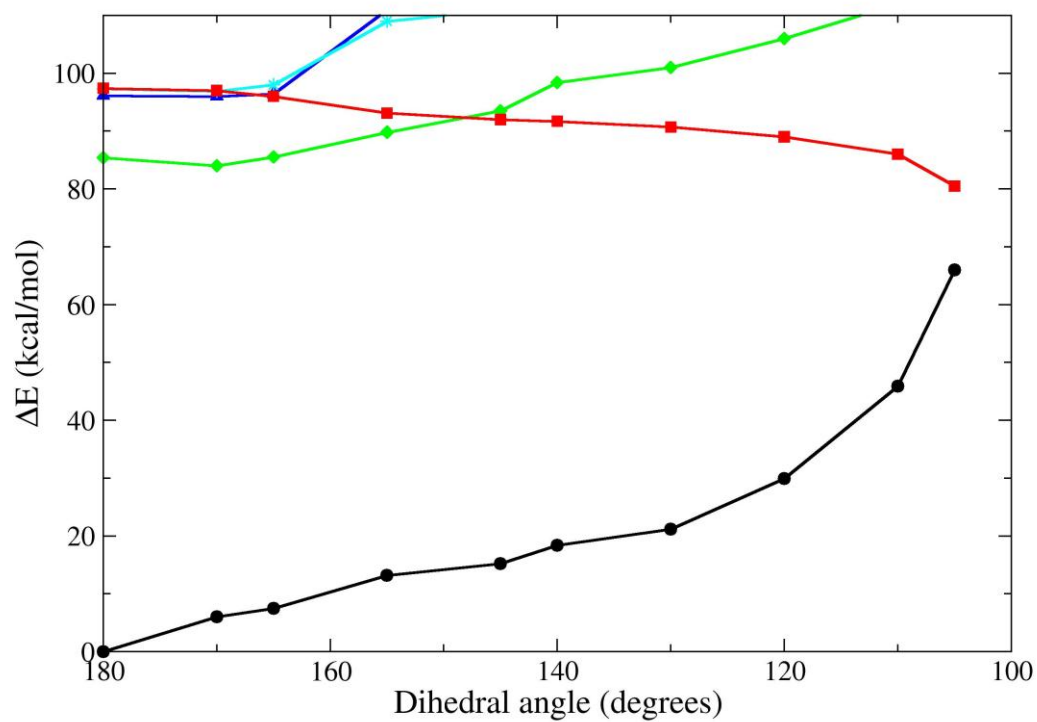

**Figure S8.** Energy profile for the ground and the four lowest singlet excited state surface of (*E*)-**2a**, as a function of the dihedral angle  $\phi$  around the C=C alkenyl double bond. ( $S_0$  —,  $S_1$  —,  $S_2$  —,  $S_3$  —,  $S_4$  —)

**Table S1.** Crystallographic data

|                                                                                                                   | ( <i>E</i> )- <b>2a</b>                                       | ( <i>Z</i> )- <b>2a</b>                             | ( <i>E</i> )- <b>2b</b>                                          | ( <i>E</i> )- <b>2c</b>                                            |
|-------------------------------------------------------------------------------------------------------------------|---------------------------------------------------------------|-----------------------------------------------------|------------------------------------------------------------------|--------------------------------------------------------------------|
| Chemical formula                                                                                                  | C <sub>14</sub> H <sub>23</sub> ClN <sub>2</sub> Pt           | C <sub>14</sub> H <sub>23</sub> ClN <sub>2</sub> Pt | C <sub>15</sub> H <sub>25</sub> ClN <sub>2</sub> OPt             | C <sub>14</sub> H <sub>22</sub> ClN <sub>3</sub> O <sub>2</sub> Pt |
| <i>M</i> <sub>r</sub>                                                                                             | 449.88                                                        | 449.88                                              | 479.91                                                           | 494.88                                                             |
| Crystal system,<br>space group                                                                                    | Orthorhombic,<br><i>Pbca</i>                                  | Monoclinic,<br><i>P2<sub>1</sub>/n</i>              | Orthorhombic,<br><i>P2<sub>1</sub>2<sub>1</sub>2<sub>1</sub></i> | Monoclinic,<br><i>C2/c</i>                                         |
| <i>a</i> , <i>b</i> , <i>c</i> (Å)                                                                                | 21.7511 (17),<br>11.4643 (9),<br>37.772 (3)                   | 7.9854 (4),<br>20.2676 (10),<br>9.6517 (5)          | 10.0881 (6),<br>12.1859 (6),<br>13.5748 (6)                      | 27.2807 (7),<br>8.1215 (2),<br>15.6844 (4)                         |
| α, β, γ (°)                                                                                                       | 90, 90, 90                                                    | 90, 97.931 (3),<br>90                               | 90, 90, 90                                                       | 90, 97.426(2), 90                                                  |
| <i>V</i> (Å <sup>3</sup> )                                                                                        | 9418.8 (13)                                                   | 1547.14 (14)                                        | 1668.79 (15)                                                     | 3445.89 (15)                                                       |
| <i>Z</i>                                                                                                          | 24                                                            | 4                                                   | 4                                                                | 8                                                                  |
| μ (mm <sup>-1</sup> )                                                                                             | 9.10                                                          | 9.23                                                | 8.57                                                             | 8.31                                                               |
| T(K)                                                                                                              | 150                                                           | 150                                                 | 150                                                              | 293                                                                |
| Crystal size (mm)                                                                                                 | 0.90 × 0.30 × 0.14                                            | 0.50 × 0.44 ×<br>0.27                               | 0.48 × 0.34 ×<br>0.15                                            | 0.17 × 0.12 ×<br>0.03                                              |
| Absorption<br>correction                                                                                          | Integration +<br>multiscan<br><i>XPREP</i> +<br><i>SADABS</i> | Multi-scan<br><i>SADABS</i>                         | Multi-scan<br><i>SADABS</i>                                      | Multi-scan<br><i>SADABS</i>                                        |
| <i>T</i> <sub>min</sub> , <i>T</i> <sub>max</sub>                                                                 | 0.020, 0.291                                                  | 0.031, 0.080                                        | 0.14, 0.28                                                       | 0.721, 1.00                                                        |
| No. of measured,<br>independent and<br>observed [ <i>I</i> > 2σ( <i>I</i> )]<br>reflections                       | 135583, 11993,<br>10157                                       | 14968, 4319,<br>3576                                | 19914, 4104,<br>3923                                             | 32586, 4290,<br>3364                                               |
| No. of parameters                                                                                                 | 487                                                           | 163                                                 | 182                                                              | 194                                                                |
| No. of restraints                                                                                                 | 0                                                             | 0                                                   | 0                                                                | 0                                                                  |
| <i>R</i> <sub>int</sub>                                                                                           | 0.065                                                         | 0.047                                               | 0.034                                                            | 0.061                                                              |
| (sin θ/λ) <sub>max</sub> (Å <sup>-1</sup> )                                                                       | 0.681                                                         | 0.714                                               | 0.680                                                            | 0.668                                                              |
| <i>R</i> [ <i>F</i> <sup>2</sup> > 2σ( <i>F</i> <sup>2</sup> )],<br><i>wR</i> ( <i>F</i> <sup>2</sup> ), <i>S</i> | 0.031, 0.069,<br>1.08                                         | 0.053, 0.131,<br>1.13                               | 0.018, 0.039,<br>1.00                                            | 0.047, 0.123,<br>1.02                                              |
| Δρ <sub>max</sub> , Δρ <sub>min</sub> (e Å <sup>-3</sup> )                                                        | 3.18, -1.14                                                   | 4.70, -3.49                                         | 1.35, -0.90                                                      | 7.76, -0.870                                                       |
| Flack parameter <sup>*</sup>                                                                                      | –                                                             | –                                                   | -0.009 (6)                                                       | –                                                                  |

\* H. D. Flack, *Acta Cryst. A*, 1983, **39**, 876-881.

**Table S2.** Comparison of the experimental and calculated (with B3LYP, BH-HLYP, PBE and PBE0 functionals) main geometrical parameters for complex (*E*)-**2a**.

|            | ( <i>E</i> )-2a (exp.)         | B3LYP  | BH-HLYP | PBE    | PBE0   |
|------------|--------------------------------|--------|---------|--------|--------|
| Pt1-N1     | 2.068(4)- 2.074(4) -2.072(4)   | 2.148  | 2.130   | 2.128  | 2.107  |
| Pt1-N2     | 2.164(4)-2.185(4)- 2.180(4)    | 2.274  | 2.241   | 2.254  | 2.222  |
| Pt1-Cl1    | 2.298(1)- 2.305(1)- 2.302(1)   | 2.313  | 2.302   | 2.298  | 2.284  |
| Pt1-C8     | 1.984(4)-1.983(5)-1.977(4)     | 1.992  | 1.989   | 1.978  | 1.974  |
| C8-C7      | 1.315(7)- 1.322(7) -1.330(6)   | 1.340  | 1.328   | 1.352  | 1.339  |
| C7-C1      | 1.479(6)-1.481(7)- 1.475(6)    | 1.472  | 1.469   | 1.470  | 1.467  |
| N1-Pt1-N2  | 84.8(2) - 84.4(2) - 84.5(2)    | 83.28  | 83.44   | 83.82  | 84.03  |
| C8-Pt1-Cl1 | 90.4(1) - 92.2(1) -91.7(1)     | 90.16  | 89.77   | 90.60  | 90.17  |
| N2-Pt1-Cl1 | 92.5(2) - 91.8(1) - 93.0(1)    | 91.96  | 92.00   | 91.52  | 91.85  |
| C8-Pt1-N1  | 92.4(2) - 91.9(2) - 90.8(2)    | 94.59  | 94.76   | 94.04  | 93.96  |
| C7-C8-Pt1  | 127.4(4) - 131.7(4) - 128.1(4) | 127.34 | 127.43  | 127.40 | 127.13 |
| C8-C7-C1   | 127.5(5) -124.4(5) - 127.1(4)  | 127.30 | 127.21  | 127.31 | 127.06 |
| A          | 49.7 - 86.1 - 89.8             | 78.0   | 82.2    | 77.0   | 78.2   |
| B          | 25.8 - 5.8 - 23.2              | 9.5    | 30.6    | 4.0    | 10.2   |

**Table S3.** Pt...H<sub>ortho</sub> distances and Mulliken atomic charges on Pt, Cl and H<sub>ortho</sub> in CHCl<sub>3</sub> solution of (*E*) and (*Z*)-**2a-2d**. For (*Z*)-**2c** and (*Z*)-**2d** the relative energies of the two possible conformers **A** and **B** in Chart 2 are reported. Distances in Ångstrom, energies in kJ mol<sup>-1</sup>.

| Complex                 | Conf     | Distance                | Energy | Charges |        |                    |
|-------------------------|----------|-------------------------|--------|---------|--------|--------------------|
|                         |          | Pt...H <sub>ortho</sub> |        | Pt      | Cl     | H <sub>ortho</sub> |
| ( <i>E</i> )- <b>2a</b> |          | -                       | -      | 0.152   | -0.326 | 0.138              |
| ( <i>Z</i> )- <b>2a</b> |          | 2.738                   | -      | 0.143   | -0.319 | 0.157              |
| ( <i>E</i> )- <b>2b</b> |          |                         | -      | 0.147   | -0.329 | 0.142              |
| ( <i>Z</i> )- <b>2b</b> |          | 2.779                   | -      | 0.140   | -0.321 | 0.160              |
| ( <i>E</i> )- <b>2c</b> |          |                         | -      | 0.169   | -0.320 | 0.180 / 0.155      |
| (Z)- <b>2c</b>          | <b>A</b> | 2.461                   | 0.0    | 0.101   | -0.293 | 0.226 / 0.159      |
|                         | <b>B</b> | 2.715                   | 2.9    | 0.119   | -0.302 | 0.195 / 0.179      |
| ( <i>E</i> )- <b>2d</b> |          |                         | -      | 0.155   | -0.326 | 0.137 / 0.120      |
| (Z)- <b>2d</b>          | <b>A</b> | 2.633                   | 0.2    | 0.076   | -0.298 | 0.197 / 0.134      |
|                         | <b>B</b> | 2.764                   | 0.0    | 0.089   | -0.298 | 0.175 / 0.197      |

**Table S4.** Natural bond analysis: summary of second order perturbation theory analysis of Fock matrix in NBO basis. l.p. = lone pair. E(2) = energy contribution (kJ mol<sup>-1</sup>) to non-Lewis delocalization.

| Complex | Conf | Donor NBO            | Acceptor NBO                   | E(2) |
|---------|------|----------------------|--------------------------------|------|
| (Z)-2a  |      | $\pi(\text{Pt-Cl})$  | $\sigma^*(\text{C-H}_{ortho})$ | 3.1  |
|         |      | $d_{z^2}(\text{Pt})$ | $\sigma^*(\text{C-H}_{ortho})$ | 4.3  |
|         |      | l.p. (Cl)            | $\sigma^*(\text{C-H}_{ortho})$ | 2.9  |
| (Z)-2b  | A    | $d_{z^2}(\text{Pt})$ | $\sigma^*(\text{C-H}_{ortho})$ | 4.1  |
|         |      | l.p. (Cl)            | $\sigma^*(\text{C-H}_{ortho})$ | 3.0  |
| (Z)-2c  | A    | $\pi(\text{Pt-Cl})$  | $\sigma^*(\text{C-H}_{ortho})$ | 3.3  |
|         |      | $d_{z^2}(\text{Pt})$ | $\sigma^*(\text{C-H}_{ortho})$ | 13.9 |
| (Z)-2c  | B    | $\pi(\text{Pt-Cl})$  | $\sigma^*(\text{C-H}_{ortho})$ | 3.9  |
|         |      | $d_{z^2}(\text{Pt})$ | $\sigma^*(\text{C-H}_{ortho})$ | 5.9  |
|         |      | l.p. (Cl)            | $\sigma^*(\text{C-H}_{ortho})$ | 3.9  |
| (Z)-2d  | A    | $\pi(\text{Pt-Cl})$  | $\sigma^*(\text{C-H}_{ortho})$ | 3.3  |
|         |      | $d_{z^2}(\text{Pt})$ | $\sigma^*(\text{C-H}_{ortho})$ | 7.3  |
| (Z)-2d  | B    | $\pi(\text{Pt-Cl})$  | $\sigma^*(\text{C-H}_{ortho})$ | 2.8  |
|         |      | $d_{z^2}(\text{Pt})$ | $\sigma^*(\text{C-H}_{ortho})$ | 4.3  |
|         |      | l.p. (Cl)            | $\sigma^*(\text{C-H}_{ortho})$ | 2.5  |

**Table S5.** Energies and nature of the contributing molecular orbitals for the twenty lowest transitions of (*E*)-**2a**.

| Energy | Intensity×100 | Electronic transitions |                            |                                                                                                                                                                        |
|--------|---------------|------------------------|----------------------------|------------------------------------------------------------------------------------------------------------------------------------------------------------------------|
| 309 nm | 2.04          | H → L+1                | S <sub>1</sub>             | ( $\pi \rightarrow d_{x^2-y^2}^*$ )                                                                                                                                    |
| 290 nm | 0.02          | H-1 → L+1              | S <sub>2</sub>             | ( $p_z(\text{Cl}) + d_{yz} \rightarrow d_{x^2-y^2}^*$ )                                                                                                                |
| 286 nm | 1.36          | H-2 → L+1              | S <sub>3</sub>             | ( $d_{z^2} \rightarrow d_{x^2-y^2}^*$ )                                                                                                                                |
| 277 nm | 41.2          | H → L                  | S <sub>4</sub>             | ( $\pi \rightarrow \pi^*$ )                                                                                                                                            |
| 265 nm | 0.53          | H-4(3) → L+1           | S <sub>5</sub>             | ( $d_{xz} (p_x(\text{Cl}) + d_{xy}) \rightarrow d_{x^2-y^2}^*$ )                                                                                                       |
| 260 nm | 19.4          | H → L+2                | S <sub>6</sub>             | ( $\pi \rightarrow \pi^*_{\text{phen}}$ )                                                                                                                              |
| 257 nm | 0.47          | H-1 → L                | S <sub>7</sub>             | ( $p_z(\text{Cl}) + d_{yz} \rightarrow \pi^*$ )                                                                                                                        |
| 254 nm | 0.65          | H-2 → L                | S <sub>8</sub>             | ( $d_{z^2} \rightarrow \pi^*$ )                                                                                                                                        |
| 244 nm | 0.31          | H → L+3                | S <sub>9</sub>             | ( $\pi \rightarrow \sigma^*_{\text{CH}(\text{tmeda})}$ )                                                                                                               |
| 241 nm | 5.71          | H-3 → L<br>H-4 → L+1   | S <sub>10</sub>            | ( $p_x(\text{Cl}) + d_{xy} \rightarrow \pi^*$ )<br>( $d_{xz} (p_x(\text{Cl}) + d_{xy}) \rightarrow d_{x^2-y^2}^*$ )                                                    |
| 237 nm | 0.66          | H → L+4                | S <sub>11</sub>            | ( $\pi \rightarrow \sigma^*_{\text{CN}(\text{tmeda})}$ )                                                                                                               |
| 236 nm | 0.98          | H-3 → L<br>H-3 → L+1   | S <sub>12</sub><br>H-4 → L | ( $p_x(\text{Cl}) + d_{xy} \rightarrow \pi^*$ )<br>( $p_x(\text{Cl}) + d_{xy} \rightarrow d_{x^2-y^2}^*$ )<br>( $d_{xz} (p_x(\text{Cl}) + d_{xy}) \rightarrow \pi^*$ ) |
| 227 nm | 0.30          | H-1 → L+3              | S <sub>13</sub>            | ( $p_z(\text{Cl}) + d_{yz} \rightarrow \sigma^*_{\text{CH}(\text{tmeda})}$ )                                                                                           |
| 225 nm | 3.54          | H-4 → L                | S <sub>14</sub>            | ( $d_{xz} (p_x(\text{Cl}) + d_{xy}) \rightarrow \pi^*$ )                                                                                                               |
| 222 nm | 1.23          | H-1 → L+4              | S <sub>15</sub>            | ( $p_z(\text{Cl}) + d_{yz} \rightarrow \sigma^*_{\text{CN}(\text{tmeda})}$ )                                                                                           |
| 221 nm | 1.81          | H-2 → L+3<br>H-1 → L+4 | S <sub>16</sub>            | ( $d_{z^2} \rightarrow \sigma^*_{\text{CH}(\text{tmeda})}$ )<br>( $p_z(\text{Cl}) + d_{yz} \rightarrow \sigma^*_{\text{CN}(\text{tmeda})}$ )                           |
| 217 nm | 8.30          | H-5 → L                | S <sub>17</sub>            | ( $\pi_{\text{arom}} \rightarrow \pi^*$ )                                                                                                                              |
| 216 nm | 0.11          | H-1 → L+2              | S <sub>18</sub>            | ( $p_z(\text{Cl}) + d_{yz} \rightarrow \pi^*_{\text{phen}}$ )                                                                                                          |
| 214 nm | 2.23          | H-2 → L+4              | S <sub>19</sub>            | ( $d_{z^2} \rightarrow \sigma^*_{\text{CH}(\text{tmeda})}$ )                                                                                                           |
| 212 nm | 2.21          | H-2 → L+2              | S <sub>20</sub>            | ( $d_{z^2} \rightarrow \pi^*_{\text{phen}}$ )                                                                                                                          |
